# Supplementary material for: Twinned crystal Cd0.9Zn0.1S/MoO3 nanorod S-scheme heterojunctions as promising photocatalysts for efficient hydrogen evolution
Source: Royal Society of Chemistry journal article supplement (doi:10.1039/d4dt00585f), 2024-01-01
Supplement: d4dt00585f1.pdf [file d4dt00585f1.pdf]

## Supporting Information

### Twinned Crystal $\text{Cd}_{0.9}\text{Zn}_{0.1}\text{S}/\text{MoO}_3$ Nanorods S-Scheme Heterojunctions as Promising Photocatalysts for Efficient Hydrogen Evolution

Jie Chen <sup>a</sup>, Ying Xie <sup>a,\*</sup>, Haitao Yu <sup>a</sup>, Zhenzi Li <sup>b</sup>, Wei Zhou <sup>\*,b</sup>

<sup>a</sup> Key Laboratory of Functional Inorganic Material Chemistry, Ministry of Education, School of Chemistry and Materials Science, Heilongjiang University, Harbin, 150080, PR China.

<sup>b</sup> Shandong Provincial Key Laboratory of Molecular Engineering, School of Chemistry and Chemical Engineering, Qilu University of Technology (Shandong Academy of Sciences), Jinan, Shandong 250353, PR China.

\*Corresponding author: Ying Xie

E-mail: xieying@hlju.edu.cn (Dr. Ying Xie).

\*Corresponding author: Wei Zhou

E-mail: wzhou@qlu.edu.cn

## 1. Experimental

### 1.1. Material preparation

The chemical reagents used were ammonium molybdate ( $(\text{NH}_4)_2\text{MoO}_4 \cdot 10\text{H}_2\text{O}$ , Aladdin Reagent Co.), nitric acid ( $\text{HNO}_3$ , Aladdin Reagent Co.), cadmium acetate dihydrate ( $\text{Cd}(\text{CH}_3\text{COO})_2 \cdot 2\text{H}_2\text{O}$ , Bide Pharmaceuticals), zinc acetate dihydrate ( $\text{Zn}(\text{CH}_3\text{COO})_2 \cdot 2\text{H}_2\text{O}$ , Guangfu Group), thioacetamide ( $\text{C}_2\text{H}_5\text{NS}$ , Aladdin Reagent Co.), and ethylenediamine, and they were all analytical grade and used without further purification.

$\text{MoO}_3$  was synthesized by a hydrothermal reaction. In the synthesis, 1.0 g of ammonium molybdate was first dispersed into a solution of concentrated nitric acid and deionized water at a ratio of 1:5 to form a mixed solution. After stirring for about 30 min, the above solution was transferred to a 100 mL polyethylene lined stainless steel autoclave and kept at 180 °C for 24 h. After the reaction was completed, the mixture was cooled to room temperature. After centrifugation and washing three times with deionized water and ethanol, the product was dried in a vacuum oven at 60 °C for 12 h to obtain  $\text{MoO}_3$ .

$\text{Cd}_{0.9}\text{Zn}_{0.1}\text{S}$  was synthesized via ethylenediamine as an auxiliary pathway via a hydrothermal reaction.<sup>1</sup> 18 mmol  $\text{Cd}(\text{CH}_3\text{COO})_2 \cdot 2\text{H}_2\text{O}$  and 2 mmol  $\text{Zn}(\text{CH}_3\text{COO})_2 \cdot 2\text{H}_2\text{O}$  was added into 50 mL deionized water under constant stirring. 25 mmol thioacetamide and 10 mL ethylenediamine were then added to the above aqueous solution, and the mixture was stirred for 1 h. Then, the above solution was transferred to a 100 mL polyethylene lined stainless steel autoclave and kept at 180 °C for 12 h. After the reaction was completed, the mixture was cooled to room temperature. After centrifugation and washing three times with deionized water and ethanol, the product was dried in a vacuum oven at 60 °C for 12 h to obtain  $\text{Cd}_{0.9}\text{Zn}_{0.1}\text{S}$ .

$\text{Cd}_{0.9}\text{Zn}_{0.1}\text{S}/\text{MoO}_3$  was prepared by in situ growth. In the synthesis process, the prepared  $\text{MoO}_3$  was firstly dispersed in 30 mL of ethanol and ultrasonicated for 3 h, and  $\text{Cd}_{0.9}\text{Zn}_{0.1}\text{S}$  was dispersed in 5 mL of ethanol and similarly ultrasonicated for 3 h. Then  $\text{MoO}_3$  and  $\text{Cd}_{0.9}\text{Zn}_{0.1}\text{S}$  were mixed and stirred for 40 min, and the above solution was transferred to a 100 mL polyethylene lined stainless steel autoclave and kept at 180 °C for 24 h. After the reaction was completed, the mixture was cooled to room temperature. After centrifugation and washing three times with deionized water and ethanol, the product was dried in a vacuum oven at 60 °C for 12 h. Finally,  $\text{Cd}_{0.9}\text{Zn}_{0.1}\text{S}/\text{MoO}_3$  was obtained. According to the addition of different amounts of  $\text{Cd}_{0.9}\text{Zn}_{0.1}\text{S}$ , two proportional composites were synthesized. 0.03%  $\text{Cd}_{0.9}\text{Zn}_{0.1}\text{S}/\text{MoO}_3$ , 0.09%  $\text{Cd}_{0.9}\text{Zn}_{0.1}\text{S}/\text{MoO}_3$ , respectively.

### 1.2 Characterizations

X-ray diffraction (XRD) patterns were obtained by a Bruker D8 diffractometer using Cu K $\alpha$  radiation. The microstructures were identified by scanning electron microscopy (SEM, FEI Sirion 200) and a transmission electron microscopy (JEM-2100F). Nitrogen adsorption-desorption isotherms, specific surface areas, and pore size distributions were collected on an ASAP 2460 aperture analyzer. Optical absorption and diffuse reflectance spectrometry (UV-DRS) were performed using the UV-Vis spectrophotometer (Lambda 950). X-band electron paramagnetic resonance (EPR) spectra were recorded using a BRUKER N500 EPR spectrometer. The photoluminescence (PL) were detected on a fluorescence spectrometer (PerkinElmer FL 6500) with an excitation wavelength of 247 nm. X-ray photoelectron spectroscopy (XPS) was used to clarify the elemental chemical

composition of different samples by Japan Shimadzu/Kratos Axis Supra systems. Raman spectroscopy was used to analyze lattice vibration of the samples by the HORIBA HR 800 spectrometer. Fourier-transform infrared spectroscopy (FT-IR) was recorded on a Perkin-Elmer Spectrum One spectrometer using KBr pellets.

### 1.3 Photocatalyst test

The photocatalytic hydrogen production experiments were performed in a photocatalytic hydrogen production system (Labsolar-6A, Beijing Perfect Light Technology Co., Ltd.). A cut-off filter ( $\lambda > 400$  nm) was used to remove the UV light to produce visible light, and a 300 W Xe-lamp was used as the light source. In a typical photocatalytic test, 50 mg of photocatalyst was dispersed in 100 mL of an aqueous solution containing 10 ml of lactic acid and 90 ml of water as the sacrificial reagent, and the solution was stirred continuously during the test. Then, an appropriate amount of  $\text{H}_2\text{PtCl}_6$  was added and reduced via the photo-deposition method to load 1% Pt on the surface of the photocatalyst as co-catalysts. Before visible light irradiation, the opening was sealed with a quartz cap with a silicone rubber gasket, and the test apparatus was evacuated for 30 min to remove  $\text{O}_2$  from the reaction system. Finally, the mixture was exposed under radiation and the gas product was analyzed using a gas chromatograph (Techcomp 7900, TCD, Ar carrier) to determine hydrogen production.

### 1.4 Photoelectrochemical measurements

The samples were tested on a Princeton Versa STAT 2 electrochemical workstation with a standard three-electrode system (Ag/AgCl as reference electrode and Pt foil as counter electrode) and the electrolyte was a 0.2 M  $\text{Na}_2\text{SO}_4$  solution. First, 50 mg sample was dispersed into ethanol with ultrasonic treatment for 4 h. After the ultrasonic cleaning of FTO in ethanol, the dispersion was then evenly sprayed on a FTO glass with an airbrush, and the actual effective surface area is  $1.0 \text{ cm}^2$ . Finally, the FTO glass was placed in a tube furnace and calcined at  $350 \text{ }^\circ\text{C}$  under a  $\text{N}_2$  gas atmosphere with a heating rate of  $5 \text{ }^\circ\text{C}/\text{min}$  for 2 h. The FTO glass was cooled down to room temperature. The electrolyte was degassed by purging the solution with  $\text{N}_2$  gas for 30 min before the photoelectrochemical test, which was performed using a 300 W Xe-lamp (light intensity of  $64.2 \times 10^{-3} \text{ w}\cdot\text{cm}^{-2}$ ) with a pass filter (AM 1.5) as the light source. The carrier density ( $N_d$ ) can be calculated by the following equation,

$$N_d = \frac{2}{q\epsilon\epsilon_0} [d(1/c^2)/dv]^{-1} \quad (1)$$

where  $q$ ,  $\epsilon$ ,  $\epsilon_0$ , and  $c$  are the charge of an electron ( $1.60 \times 10^{-19} \text{ C}$ ), the dielectric constant of a semiconductor, the vacuum permittivity ( $8.854 \times 10^{-12} \text{ F}\cdot\text{cm}^{-1}$ ), and the capacitance of the depletion region, while  $V$  and  $d(1/c^2)/dv$  are the applied voltage and the slope of a Mott-Schottky plot. Moreover, during the test, a standard three-electrode system was used, with the photocatalyst as the working electrode, Ag/AgCl as the reference electrode, and Pt as the counter electrode. The conversion between the reversible hydrogen electrode (RHE), standard hydrogen electrode (SHE) and normal hydrogen electrode (NHE) is based on the following equations. The conversion between the three-electrode system and the normal hydrogen electrode (NHE) is used in this paper.

$$E(\text{RHE}) = E(\text{NHE}) + 0.0591 \times \text{pH} \quad (2)$$

$$E(\text{RHE}) = E(\text{SHE}) + 0.0591 \times \text{pH} + 0.2415 \quad (3)$$

$$E(\text{NHE})=E(\text{Ag}/\text{AgCl})+0.197 \quad (4)$$

The value to correlate the flat band potential and the conduction band is 0.197 V. Furthermore, Scanning Kelvin probe (SKP) measurements (SKP5050 system, Scotland) performed at normal laboratory conditions. The work function( $W_F$ ) can be calculated according to equation,

$$W_F(\text{eV}) = 5.1 + \frac{\Delta CPD}{1000} \quad (5)$$

Where  $\Delta CPD$  is the contact potential difference.

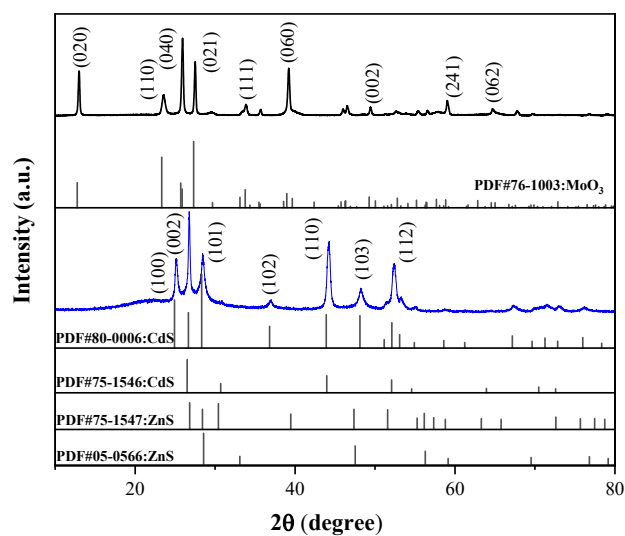

**Figure S1.** XRD patterns of  $\text{MoO}_3$  and  $\text{Cd}_{0.9}\text{Zn}_{0.1}\text{S}$ .

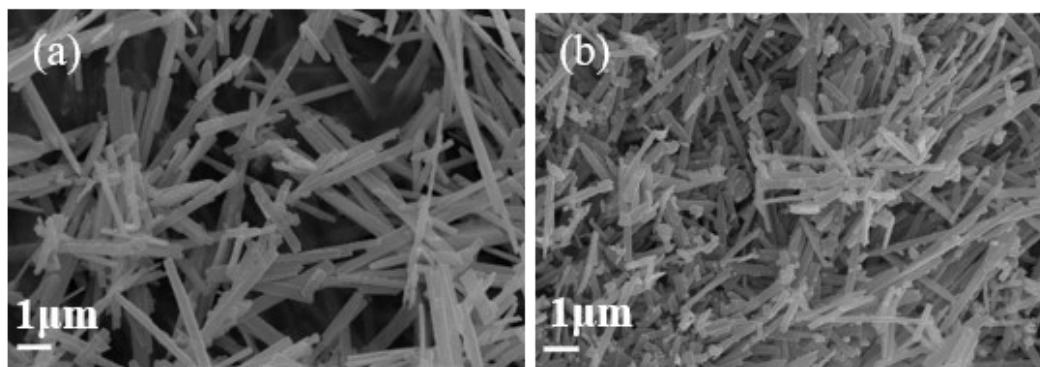

**Figure S2.** SEM images of (a)  $\text{MoO}_3$  and (b) 0.09%  $\text{Cd}_{0.9}\text{Zn}_{0.1}\text{S}/\text{MoO}_3$ .

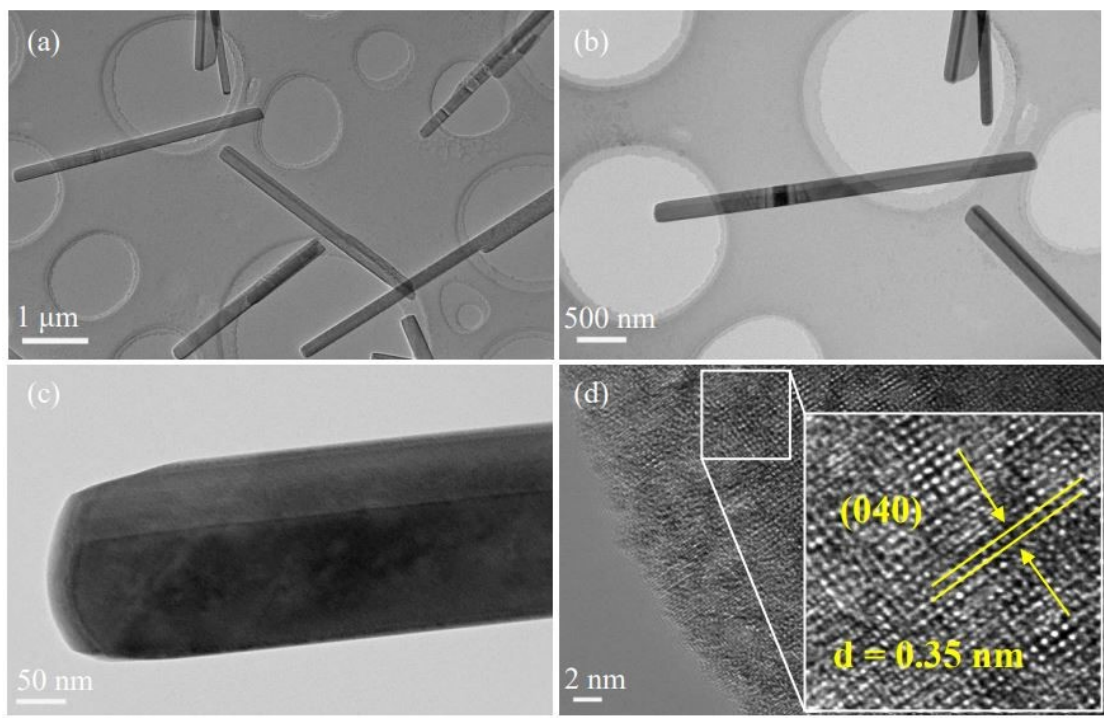

**Figure S3.** TEM (a, b, c) and HRTEM (b) images of MoO<sub>3</sub>.

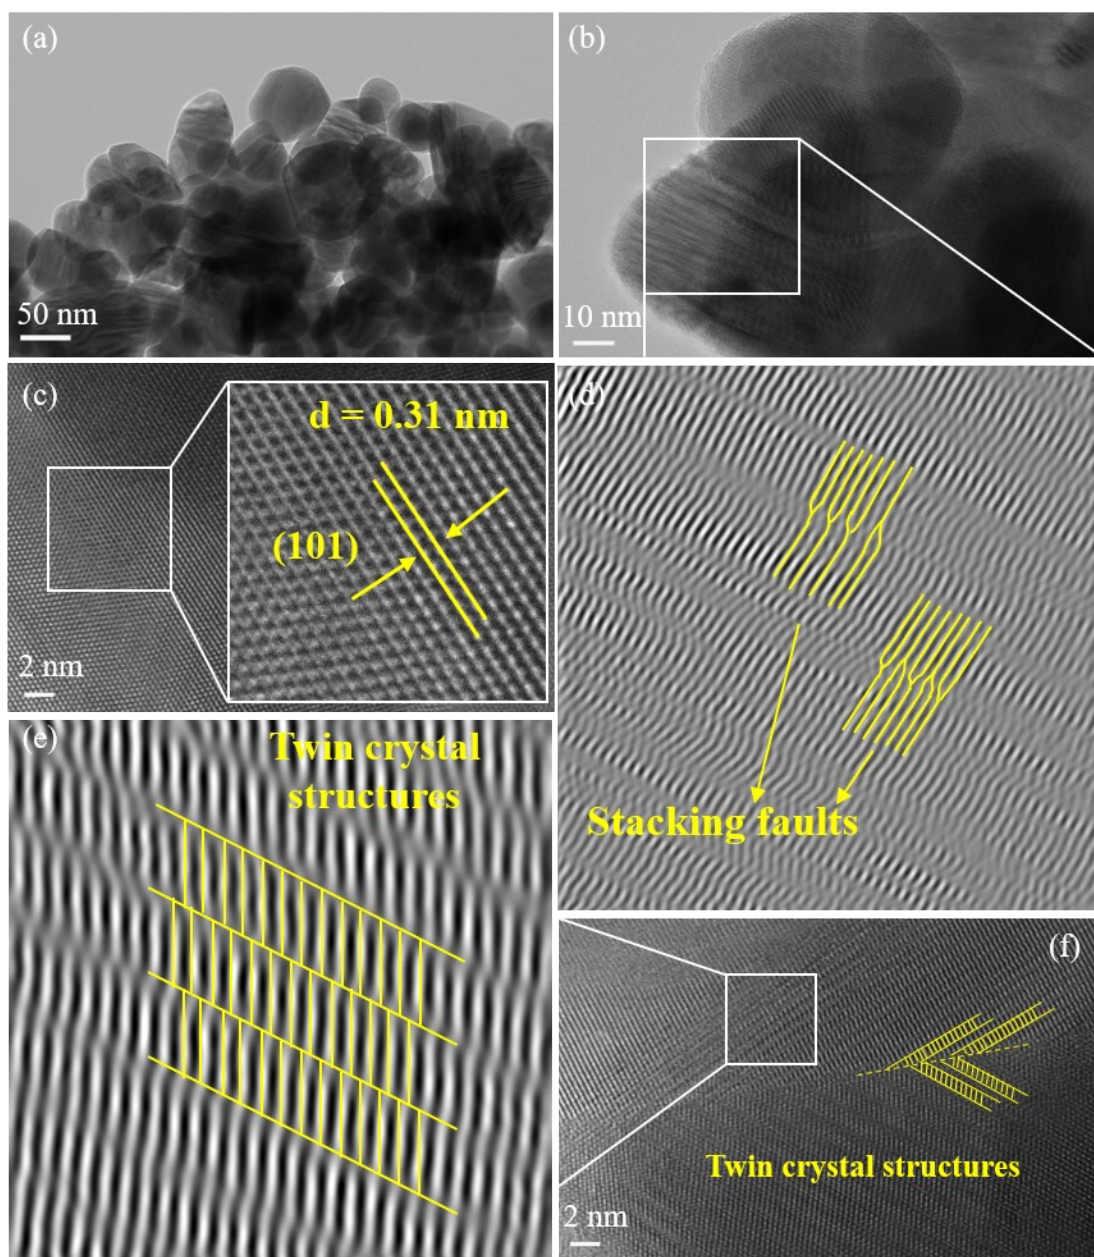

**Figure S4.** (a, b) TEM, (c) HRTEM images of Cd<sub>0.9</sub>Zn<sub>0.1</sub>S, and (d, e, f) Cd<sub>0.9</sub>Zn<sub>0.1</sub>S twin crystal structure.

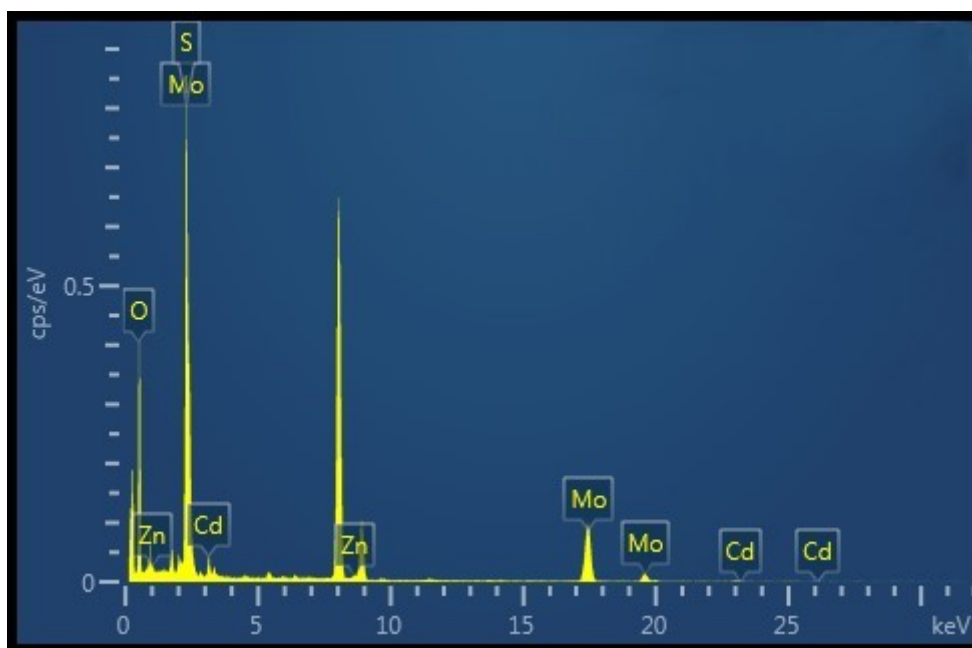

**Figure S5.** Energy dispersive spectroscopy spectra of 0.09%  $\text{Cd}_{0.9}\text{Zn}_{0.1}\text{S}/\text{MoO}_3$ , respectively.

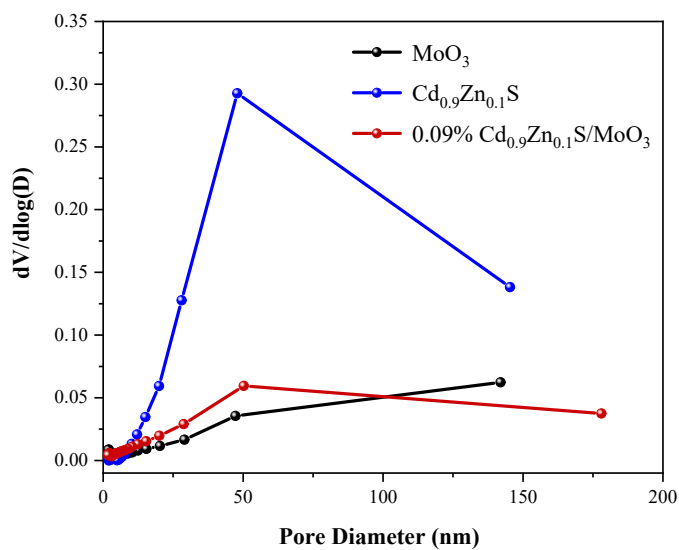

**Figure S6.** Corresponding pore-size distributions of  $\text{MoO}_3$ ,  $\text{Cd}_{0.9}\text{Zn}_{0.1}\text{S}$  and 0.09%  $\text{Cd}_{0.9}\text{Zn}_{0.1}\text{S}/\text{MoO}_3$ , respectively.



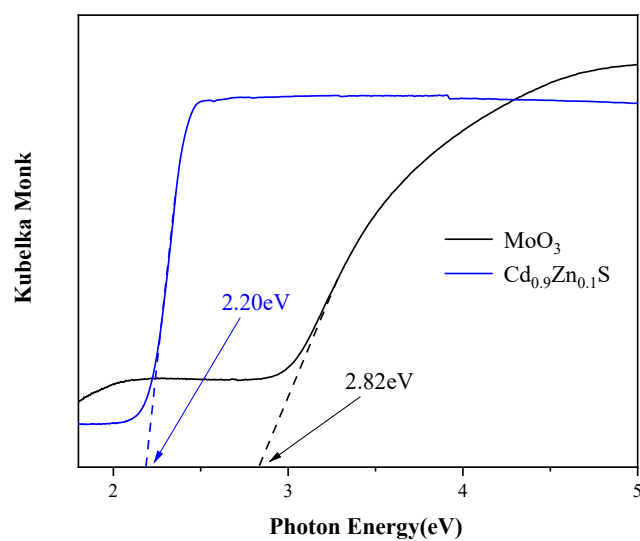

**Figure S7.** Optical band gaps of MoO<sub>3</sub> and Cd<sub>0.9</sub>Zn<sub>0.1</sub>S.

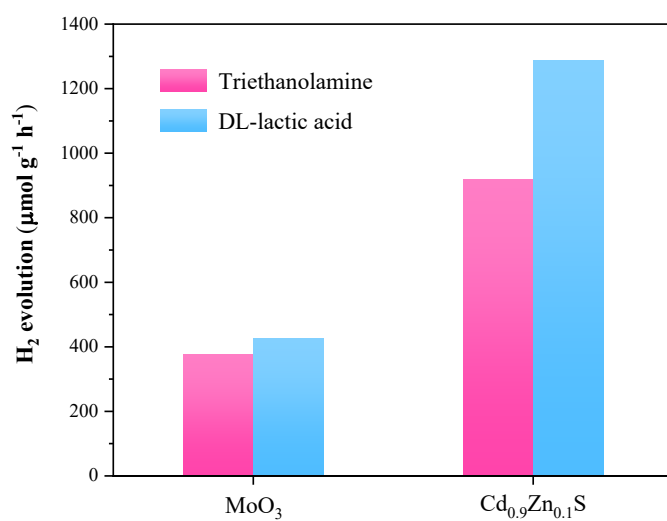

**Figure S8.** Photocatalytic hydrogen evolution rates of MoO<sub>3</sub>, Cd<sub>0.9</sub>Zn<sub>0.1</sub>S under triethanolamine and lactic acid.

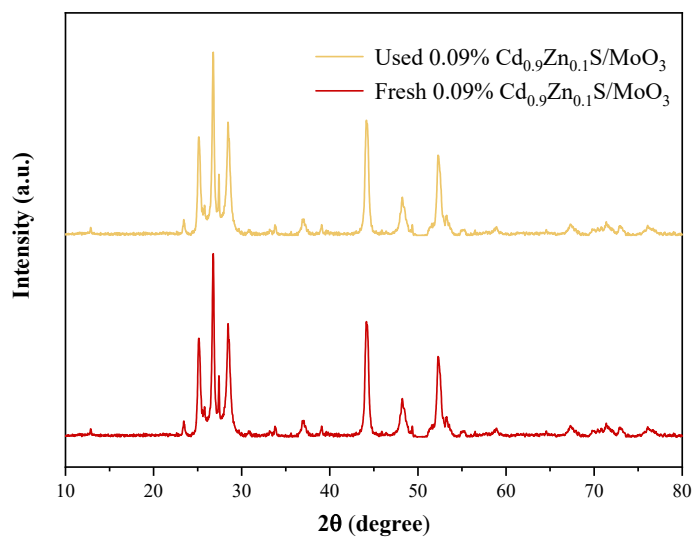

**Figure S9.** XRD patterns for the fresh and used 0.09% Cd<sub>0.9</sub>Zn<sub>0.1</sub>S/MoO<sub>3</sub> after 3 cycles.

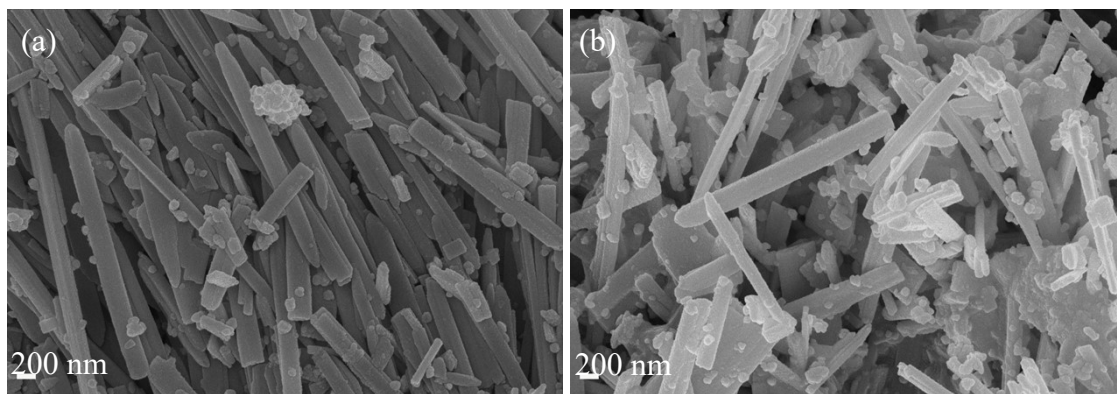

**Figure S10.** SEM images for the fresh and used 0.09% Cd<sub>0.9</sub>Zn<sub>0.1</sub>S/MoO<sub>3</sub> after 3 cycles.

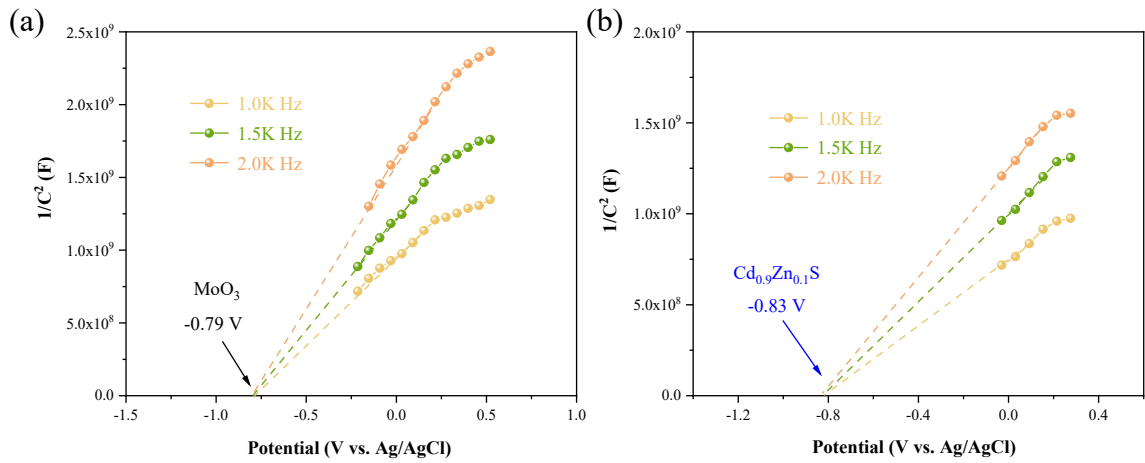

Figure S11. Mott-Schottky plots of MoO<sub>3</sub> and Cd<sub>0.9</sub>Zn<sub>0.1</sub>S, respectively.

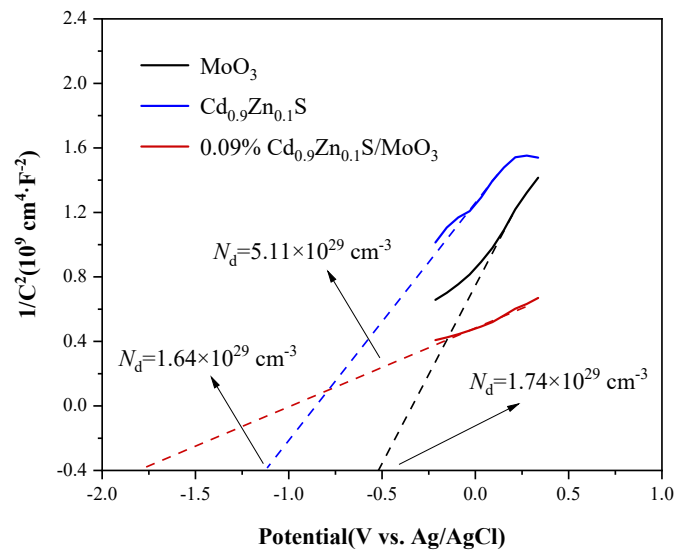

Figure S12. Carrier density plots of MoO<sub>3</sub>, Cd<sub>0.9</sub>Zn<sub>0.1</sub>S and 0.09% Cd<sub>0.9</sub>Zn<sub>0.1</sub>S/MoO<sub>3</sub>.

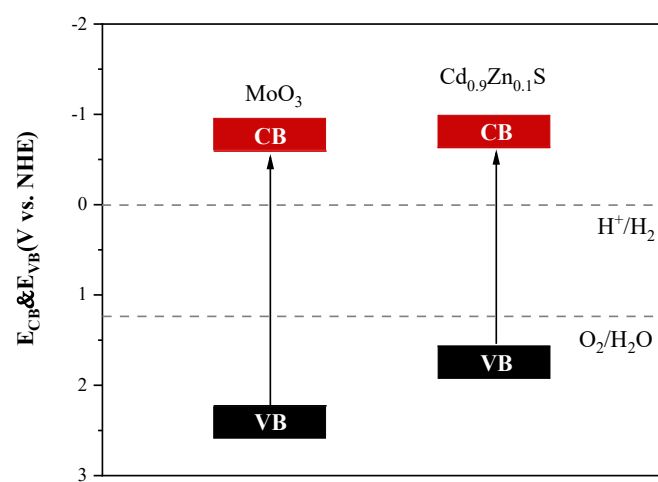

**Figure S13.** Band structure diagrams for MoO<sub>3</sub> and Cd<sub>0.9</sub>Zn<sub>0.1</sub>S.

**Table S1** BET specific surface areas, pore volumes and pore sizes of different samples.

| Samples                                                | S <sub>BET</sub> (m <sup>2</sup> g <sup>-1</sup> ) | Pore volume (cm <sup>3</sup> g <sup>-1</sup> ) | Pore size (nm) |
|--------------------------------------------------------|----------------------------------------------------|------------------------------------------------|----------------|
| MoO <sub>3</sub>                                       | 8.4423                                             | 0.042362                                       | 22.6469        |
| Cd <sub>0.9</sub> Zn <sub>0.1</sub> S                  | 20.4079                                            | 0.215579                                       | 40.9524        |
| Cd <sub>0.9</sub> Zn <sub>0.1</sub> S/MoO <sub>3</sub> | 11.5497                                            | 0.062730                                       | 24.7506        |

**Table S2** Comparison of photocatalytic H<sub>2</sub> evolution rate of the metal sulfide photocatalysts

| Photocatalyst                                                         | Sacrificial agent                                               | Light source                                                   | H <sub>2</sub> evolution rate<br>( $\mu\text{mol h}^{-1} \text{g}^{-1}$ ) | Ref.                 |
|-----------------------------------------------------------------------|-----------------------------------------------------------------|----------------------------------------------------------------|---------------------------------------------------------------------------|----------------------|
| CdS/MnO <sub>x</sub> -BiVO <sub>4</sub>                               | 100 mL solution                                                 | 300 W Xe<br>( $\lambda > 350 \text{ nm}$ )                     | 1010                                                                      | 2                    |
| CuO/CdS/CoWO <sub>4</sub>                                             | Na <sub>2</sub> S/Na <sub>2</sub> SO <sub>3</sub>               | 300 W Xe<br>( $\lambda > 420 \text{ nm}$ )                     | 457.9                                                                     | 3                    |
| CdS/graphene                                                          | Lactic acid                                                     | 350 W Xe<br>( $\lambda > 420 \text{ nm}$ )                     | 1120                                                                      | 4                    |
| g-C <sub>3</sub> N <sub>4</sub> -AQ-MoO <sub>3</sub>                  | TEOA                                                            | 300 W Xe<br>(A.M.1.5)                                          | 673                                                                       | 5                    |
| 1.5wt% Pt MoO <sub>3</sub> /g-C <sub>3</sub> N <sub>4</sub>           | TEOA                                                            | 300 W Xe<br>( $\lambda > 400 \text{ nm}$ )                     | 205.2                                                                     | 6                    |
| CdS/MoO <sub>3</sub>                                                  | 0.25 M Na <sub>2</sub> S/0.25 M Na <sub>2</sub> SO <sub>3</sub> | 300 W Xe<br>( $\lambda > 420 \text{ nm}$ )                     | 201.4                                                                     | 7                    |
| Amine-CdS/MoO <sub>3</sub>                                            | 0.25 M Na <sub>2</sub> S/0.25 M Na <sub>2</sub> SO <sub>3</sub> | 300 W Xe<br>( $\lambda > 420 \text{ nm}$ )                     | 1029.8                                                                    | 7                    |
| Cu <sub>2</sub> S/MoO <sub>3</sub>                                    | Na <sub>2</sub> S/Na <sub>2</sub> SO <sub>3</sub>               | Xe lamp<br>(400 W)                                             | 21.568                                                                    | 8                    |
| CdZnS                                                                 | Lactic acid                                                     | LDE lamp                                                       | 449.4                                                                     | 9                    |
| rGO/Cd <sub>x</sub> Zn <sub>1-x</sub> S                               | 0.35 M Na <sub>2</sub> S/0.25 M Na <sub>2</sub> SO <sub>3</sub> | 150 W Xe arc lamp                                              | 1060                                                                      | 10                   |
| Cd <sub>0.5</sub> Zn <sub>0.5</sub> S                                 | 0.35 M Na <sub>2</sub> S/0.25 M Na <sub>2</sub> SO <sub>3</sub> | 300 W Xe<br>( $\lambda > 400 \text{ nm}$ )                     | 1023                                                                      | 11                   |
| In <sub>2</sub> O <sub>3</sub> /Cd <sub>0.5</sub> Zn <sub>0.5</sub> S | 0.35 M Na <sub>2</sub> S/0.25 M Na <sub>2</sub> SO <sub>3</sub> | 300 W Xe<br>( $\lambda > 420 \text{ nm}$ )                     | 1110                                                                      | 12                   |
| ZnS                                                                   | 0.35 M Na <sub>2</sub> S/0.25 M Na <sub>2</sub> SO <sub>3</sub> | 300 W Xe<br>( $\lambda > 420 \text{ nm}$ )                     | 83.77                                                                     | 13                   |
| W-ZnS                                                                 | 0.35 M Na <sub>2</sub> S/0.25 M Na <sub>2</sub> SO <sub>3</sub> | 300 W Xe<br>( $\lambda > 400 \text{ nm}$ )                     | 63.68                                                                     | 14                   |
| <b>0.09% Cd<sub>0.9</sub>Zn<sub>0.1</sub>S/MoO<sub>3</sub></b>        | <b>Lactic acid</b>                                              | <b>300 W Xe<br/>(<math>\lambda &gt; 400 \text{ nm}</math>)</b> | <b>3909.79</b>                                                            | <b>This<br/>work</b> |

## References

1. M. Liu, D. Jing, Z. Zhou and L. Guo, *Nat. Commun.*, 2013, **4**, 2278.
2. D. Gogoi, A. K. Shah, P. Rambabu, M. Qureshi, A. K. Golder and N. R. Peela, *ACS Appl. Mater. Interfaces*, 2021, **13**, 45119-46212.
3. N. Güy, K. Atacan and M. Ozacar, *Renewable Energy*, 2022, **195**, 107-120.
4. Q. Li, B. Guo, J. Yu, J. Ran, B. Zhang, H. Yan and J. R. Gong, *J. Am. Chem. Soc.*, 2011, **133**, 10878-10884.
5. X. Ma, G. Wang, L. Qin, J. Liu, B. Li, Y. Hu and H. Cheng, *Appl. Catal., B*, 2021, **288**, 120025.
6. K. Li, W. Wu, Y. Jiang, Z. Wang, X. Liu, J. Li, D. Xia, X. Xu, J. Fan and K. Lin, *Inorganic Chemistry Frontiers*, 2021, **8**, 1154.
7. S. Wang, X. Zhao, H. M. A. Sharif, Z. Chen, Y. Chen, B. Zhou, K. Xiao, B. Yang and Q. Duan, *Chem. Eng. J.*, 2021, **406**, 126849.
8. S. B. Patil, B. Kishore, K. Manjunath, V. Reddy and G. Nagaraju, *Int. J. Hydrogen Energy*, 2018 **43**, 4003-4014.
9. L. M. Song, S. J. Zhang, D. Liu, S. Sun and J. Wei, *Int. J. Hydrogen Energy*, 2020, **45**, 8234-8242.
10. Q. Li, H. Meng, J. Yu, W. Xiao, Y. Zheng and J. Wang, *Chem. Eur. J*, 2014.
11. L. H. Zhang, F. D. Zhang, H. Xue, J. Gao, Y. Peng, W. Song and L. Ge, *Chin. J. Catal.*, 2021, **42**, 1677-1688.
12. H. Yang, J. Tang, Y. Luo, X. Zhan, Z. Liang, L. Jiang, H. Hou and W. Yang, *Small*, 2021, **17**, 2102307.
13. X. Hao, Y. Wang, J. Zhou, Z. Cui, Y. Wang and Z. Zou, *Appl. Catal., B*, 2018, **221**, 302-311.
14. B. Xiao, T. Lv, J. Zhao, Q. Rong, H. Zhang, H. Wei, J. He, J. Zhang, Y. Zhang, Y. Peng and Q. Liu, *ACS Catal.*, 2021, **11**, 13255-13265.
